# Supplementary material
Source: HighWire-hosted journal article supplement (https://bmjopen.bmj.com/content/11/9/e047449)
Supplement: inline-supplementary-material-1 [file inline-supplementary-material-1.pdf]

## Search strategy for MEDLINE

- 1 - exp Neuromuscular Diseases/co, di, mo, nu, pa, ph, pp, pc, rh, th [Complications, Diagnosis, Mortality, Nursing, Pathology, Physiology, Physiopathology, Prevention & Control, Rehabilitation, Therapy]
- 2 - Myotonic Dystrophy/ or Muscular Dystrophy, Duchenne/ or dystrophy.mp. - [46861](#)
- 3 - muscular dystrophy.mp. or exp Muscular Dystrophies/ - [32736](#)
- 4 - Myasthenia Gravis/ or myasthenia.mp. - [17216](#)
- 5 - congenital myasthenia.mp. or exp Myasthenic Syndromes, Congenital/ - [654](#)
- 6 - myopathy.mp. or \*Muscular Diseases/ - [31947](#)
- 7 - Myopathies, Structural, Congenital/ or congenital myopathy.mp. - [1225](#)
- 8 - inflammatory myopathy.mp. or \*Myositis/ - [7195](#)
- 9 - metabolic myopathy.mp. or Mitochondrial Myopathies/ - [1972](#)
- 10 - pompe disease.mp. - [1063](#)
- 11 - spinal muscular atrophy.mp. or exp Muscular Atrophy, Spinal/ - [6338](#)
- 12 - Polyradiculoneuropathy/ or exp Guillain-Barre Syndrome/ or guillian barre.mp. or Polyneuropathies/ - [13731](#)
- 13 - Peripheral Nervous System Diseases/ or severe inherited neuropathy.mp. - [22861](#)
- 14 - amyotrophic lateral sclerosis.mp. or exp Amyotrophic Lateral Sclerosis/ - [24339](#)
- 15 - 1 or 2 or 3 or 4 or 5 or 6 or 7 or 8 or 9 or 10 or 11 or 12 or 13 or 14 - [270807](#)
- 16 - Positive-Pressure Respiration/ or Respiration, Artificial/ or Ventilator Weaning/ - [65155](#)
- 17 - Weaning/ or weaning.mp. - [33982](#)
- 18 - Airway Extubation/ or spontaneous breathing trial.mp. - [1798](#)
- 19 - 16 or 17 or 18 - [95029](#)
- 20 - 15 and 19

## Search strategy for EMBASE

- #1 - 'neuromuscular disease' OR 'muscular dystrophy' OR myasthenia OR myopathy OR 'glycogen storage disease type 2' OR 'muscle atrophy' OR polyradiculoneuropathy OR 'peripheral neuropathy' OR 'amyotrophic lateral sclerosis' - [159,527](#)
- #2 - 'artificial ventilation' OR 'ventilator weaning' OR extubation OR 'spontaneous breathing trial' - [5,215](#)
- #3 - #1 AND #2 AND [2009-2020]/py

## Search strategy for WEB OF SCIENCE

#1 - Todos os campos: (neuromuscular disease) OR Todos os campos: (muscular dystrophy) OR Todos os campos: (myasthenia) OR Todos os campos: (myopathy) OR Todos os campos: (glycogen storage disease type 2) OR Todos os campos: (muscle atrophy) OR Todos os campos: (polyradiculoneuropathy) OR Todos os campos: (peripheral neuropathy) OR Todos os campos: (amyotrophic lateral sclerosis) Índices=SCI-EXPANDED, SSCI, A&HCI, CPCI-S, CPCI-SSH, ESCI Tempo estipulado=2009-2020 - 100.078

#2 - Todos os campos: (artificial ventilation) OR Todos os campos: (ventilator weaning) OR Todos os campos: (extubation) OR Todos os campos: (spontaneous breathing trial) Índices=SCI-EXPANDED, SSCI, A&HCI, CPCI-S, CPCI-SSH, ESCI Tempo estipulado=2009-2020 - 9.840

#3 - #1 AND #2 - Índices=SCI-EXPANDED, SSCI, A&HCI, CPCI-S, CPCI-SSH, ESCI Tempo estipulado=2009-2020

## Search strategy for SCOPUS

( 'artificial AND ventilation' OR 'ventilator AND weaning' OR extubation OR 'spontaneous AND breathing AND trial' ) AND ( 'neuromuscular AND disease' OR 'muscular AND dystrophy' OR myasthenia OR myopathy OR 'glycogen AND storage AND disease AND type AND 2' OR 'muscle AND atrophy' OR polyradiculoneuropathy OR 'peripheral AND neuropathy' OR 'amyotrophic AND lateral AND sclerosis' ) AND ( LIMIT-TO ( PUBYEAR , 2020 ) OR LIMIT-TO ( PUBYEAR , 2019 ) OR LIMIT-TO ( PUBYEAR , 2018 ) OR LIMIT-TO ( PUBYEAR , 2017 ) OR LIMIT-TO ( PUBYEAR , 2016 ) OR LIMIT-TO ( PUBYEAR , 2015 ) OR LIMIT-TO ( PUBYEAR , 2014 ) OR LIMIT-TO ( PUBYEAR , 2013 ) OR LIMIT-TO ( PUBYEAR , 2012 ) OR LIMIT-TO ( PUBYEAR , 2011 ) OR LIMIT-TO ( PUBYEAR , 2010 ) OR LIMIT-TO ( PUBYEAR , 2009 ) )
